# Supplementary material
Source: MDPI journal article supplement (https://www.mdpi.com/1999-4907/11/11/1144)
Supplement: s1 [file s1]

The file 'Hambuckers\_et\_al\_Forests2020\_data.txt' contains the analysed dataset. It could be used with the R code.  
It contains the following fields:

|               |                                                                                                                                                                                       |                                                                        |
|---------------|---------------------------------------------------------------------------------------------------------------------------------------------------------------------------------------|------------------------------------------------------------------------|
| site          |                                                                                                                                                                                       |                                                                        |
| species       | IV= <i>Inga vera</i> , HT= <i>Helicostylis tomentosa</i>                                                                                                                              |                                                                        |
| utm1          | tree utm coordinate 1                                                                                                                                                                 | UTM 24L in Southern hemisphere                                         |
| utm2          | tree utm coordinate 2                                                                                                                                                                 | UTM 24L in Southern hemisphere                                         |
| srr           | seed removal rate                                                                                                                                                                     | proportion                                                             |
| tseeds        | total number of seeds estimated                                                                                                                                                       | seeds/tree ( <i>H. tomentosa</i> ) or seeds/3 sq. m ( <i>I. vera</i> ) |
| rseeds        | total number of removed seeds                                                                                                                                                         | seeds/tree ( <i>H. tomentosa</i> ) or seeds/3 sq. m ( <i>I. vera</i> ) |
| crop          | seed production                                                                                                                                                                       | seeds/sq. m                                                            |
| circumference | tree circumference at breast height                                                                                                                                                   | m                                                                      |
| htree         | tree height                                                                                                                                                                           | m                                                                      |
| scanopy       | tree canopy surface                                                                                                                                                                   | sq. m                                                                  |
| d2 to d20     | proportion of forest around the focal tree in buffer with a radius of 200 m to 2,000 m                                                                                                | %                                                                      |
| autocovariate | "computed with autocov_dist of the spdep R package (Bivand et al. 2019) with utm coordinates divided by 10000 and parametrized with nbs=3, type = ""inverse.squared"", zero.policy=T" | scaled value                                                           |
